# Supplementary material
Source: PubMed Central journal article supplement (PMC7773379)
Supplement: jci-131-142616-s093.pdf [file jci-131-142616-s093.pdf]

1 Supplementary Appendix

2

3 This appendix has been provided by the authors to give readers additional information  
4 about their work.

5

6 Supplement to: Fernandez K, Allen P, Campbell M et al. Atorvastatin is associated with  
7 cisplatin-induced hearing loss in patients with head and neck cancer.

8

9

10

11

12

13

14

15

16

17

18

19

20

21

22

23

|    |                                                                                                 |           |
|----|-------------------------------------------------------------------------------------------------|-----------|
| 24 | <b>Table of Contents</b>                                                                        |           |
| 25 | <b><i>List of investigators</i></b> .....                                                       | <b>3</b>  |
| 26 | <b><i>Inclusion and exclusion criteria</i></b> .....                                            | <b>4</b>  |
| 27 | <b><i>Site-specific contributions and study design</i></b> .....                                | <b>5</b>  |
| 28 | <b><i>TUNE analysis</i></b> .....                                                               | <b>7</b>  |
| 29 | <b><i>Figure S1: Incidence and severity of a TUNE-defined hearing loss in cisplatin-</i></b>    |           |
| 30 | <b><i>treated patients with head and neck cancer</i></b> .....                                  | <b>9</b>  |
| 31 | <b><i>Figure S2: Correlation of cochlear radiation dose and high frequency hearing</i></b>      |           |
| 32 | <b><i>sensitivity</i></b> .....                                                                 | <b>10</b> |
| 33 | <b><i>Table S1: Study participation criteria</i></b> .....                                      | <b>11</b> |
| 34 | <b><i>Table S2: Site contributions</i></b> .....                                                | <b>12</b> |
| 35 | <b><i>Table S3: Ototoxicity grading criteria</i></b> .....                                      | <b>13</b> |
| 36 | <b><i>Table S4: Logistic regression with adjusted odds ratio (OR) on the incidence of a</i></b> |           |
| 37 | <b><i>CTCAE or TUNE grade hearing loss</i></b> .....                                            | <b>14</b> |
| 38 | <b><i>Supplementary Appendix References</i></b> .....                                           | <b>15</b> |
| 39 |                                                                                                 |           |
| 40 |                                                                                                 |           |
| 41 |                                                                                                 |           |
| 42 |                                                                                                 |           |
| 43 |                                                                                                 |           |

44 **List of investigators**

45 Listed in alphabetical order by institution.

46

47 Emory University, Department of Otolaryngology – Head and Neck Surgery and  
48 Winship Center Institute

49 Nicole C. Schmitt

50

51 Johns Hopkins University, Department of Radiation Oncology and Molecular Sciences

52 Jaylon Garrett

53 Brandi Page

54

55 Medical University of South Carolina, Department of Otolaryngology – Head and Neck  
56 Surgery

57 Judy R. Dubno

58

59 National Institute on Deafness and Other Communication Disorders, NIH

60 Carmen Brewer

61 Hui Cheng

62 Anna Clements

63 Lisa L. Cunningham

64 Katharine Fernandez

65 Chuan-Ming Li

66 Marcia Mulquin

67 Nicole C. Schmitt

68

69 University of Rochester Medical Center, Department of Medicine

70 Deborah Mulford

71

72 University of Rochester Medical Center, Department of Otolaryngology

73 Paul Allen

74 Maura Campbell

75 Shawn Newlands

76

77 Walter Reed National Military Medical Center

78 Thomas Townes

79 Candice Ortiz

80

81

82

83

84

85 **Inclusion and exclusion criteria**

86 Inclusion criteria

- 87 - Newly diagnosed with head and neck squamous cell carcinoma
- 88 - Adult, 18 years or older
- 89 - Scheduled for treatment with cisplatin

90 Exclusion criteria

- 91 - Prior exposure to cisplatin, taxanes or other cytotoxic chemotherapy drugs
- 92 - Baseline audiogram >90 days before onset of first cisplatin treatment
- 93 - Baseline hearing  $\geq 95$  dB HL average threshold at 1, 2, and 4 kHz
- 94 - Indication of active middle ear disease
- 95 - Follow up audiogram >90 days after cessation of last cisplatin treatment

96

97

98

99

100

101

102

103

104

105

106

107

108 **Site-specific contributions and study design**

109 This study consisted of combined retrospective and prospective observational data  
110 obtained from three clinical sites. Audiometric data collected  $\leq 90$  days from the onset of  
111 cisplatin therapy were compared against audiometric data collected  $\leq 90$  days from  
112 completion of cisplatin therapy to determine threshold shifts. Subjects whose baseline  
113 audiogram was collected up to 1 week after the first cisplatin infusion (n=12 subjects)  
114 were included only if their hearing was within normal limits ( $\leq 20$  dB HL from 1 to 8 kHz).

115  
116 Retrospective data were collected from the University of Rochester Medical Center  
117 (URMC) (N=215 subjects). All audiometric data were collected in a sound-attenuated  
118 booth using either a Grason Stadler GSI 61 or SGI AudioStar Pro audiometer and  
119 Telephonics TDH50 headphones or EAR ER3A insert earphones and Sennheiser HDA  
120 200 headphones. Air conduction (AC) thresholds for standard frequencies (0.25 to 8  
121 kHz) as well as 12 kHz were obtained. Bone conduction (BC) audiometric thresholds  
122 were reported for 1, 2, and 4 kHz and used to screen for the presence of active middle  
123 ear disease. Additional retrospective data were collected from Walter Reed National  
124 Military Medical Center (WRNMMC) (N=34 subjects). AC thresholds were collected in a  
125 sound-attenuated booth for standard audiometric frequencies (0.25 to 8 kHz) as well as  
126 over the sensitive range for ototoxicity (SRO), up to 12.5 kHz, using an Otometrics  
127 Madsen Astera audiometer and with Sennheiser HDA-200 or RadioEar IP30  
128 headphones. Tympanometry was used to screen for active middle ear disease. Prior to  
129 data sharing with NIH collaborators for analyses, URMC and WRNMMC removed  
130 personal identifiable information (PII)/personal health information (PHI) from the

131 dataset. Coded IDs were assigned to each subject, and the code was not shared with  
132 NIH investigators.

133

134 Prospective data were collected in a collaborative, observational study through a  
135 National Institutes of Health (NIH) partnership with Johns Hopkins University (JHU).  
136 Audiometric data were collected using an FDA-approved SHOEBOX iPad-based  
137 audiometer (Clearwater Clinical, Inc), with Sennheiser HDA-280 headphones (ANSI  
138 S3.6),<sup>4</sup> for standard test frequencies (1 to 8 kHz) and extended high frequencies (EHF)  
139 including 10 and 12.5 kHz. The SHOEBOX Audiometer has been validated for use  
140 outside of a sound booth.<sup>5</sup> All auditory thresholds were measured in a quiet meeting  
141 room with SHOEBOX Smart Testing enabled to monitor ambient noise. Tympanometry  
142 (MT10 Interacoustics) was used to screen for the presence of active middle ear  
143 disease. AC thresholds for all 277 subjects were analyzed at 0.25, 0.5, 1, 2, 3, 4, 6, 8  
144 and 12.5 kHz from baseline and post-treatment audiograms. Data from URMC collected  
145 at 12 kHz were grouped with 12.5 kHz data from WRNMMC and NIH/JHU. Frequencies  
146 at which data were available for <70% of the total number of subjects were excluded  
147 from analyses; an example of this is the interoctave frequencies measured using SRO  
148 monitoring at WRNMMC only. If a subject had no response at the output limits of the  
149 audiometer, a threshold value was assigned as the maximum output level plus 5 dB.

150

151

152 **TUNE analysis**

153 Changes in hearing were primarily defined using CTCAEv5.0 criteria.<sup>6</sup> However,  
154 cisplatin-induced ototoxicity is characterized initially as a high frequency (above 8 kHz)  
155 hearing loss that can spread to include lower frequencies.<sup>5</sup> Therefore, we also applied  
156 the TUNE grading scale,<sup>6</sup> which reports incidence and severity of hearing loss based on  
157 shifts in auditory thresholds across two frequency ranges: 1 - 4 kHz and 8-12.5 kHz  
158 (Table S3). We modified the higher-frequency range of the TUNE scale to include 6, 8  
159 and 12.5 kHz due to insufficient data at 10 kHz in our dataset. Because many of our  
160 subjects had some hearing loss at baseline, we further modified the TUNE criteria so  
161 that Grades 3 and 4 utilized threshold shift data instead of absolute thresholds. A  
162 TUNE Grade 3 was redefined for this study as a  $\geq 35$  dB PTA threshold shift from the  
163 baseline to the post-treatment audiogram, and similarly Grade 4 was redefined as a  $\geq$   
164 50 dB PTA threshold shift.

165  
166 Changes in hearing, defined by TUNE criteria, were analyzed using categorical  
167 incidence (per ear) data. The incidence and severity distribution of a clinically  
168 meaningful hearing change, per ear, relative to statin use was analyzed using chi-  
169 square analyses (SAS PROC FREQ procedure). The rate difference, with 95%  
170 confidence intervals, of a TUNE-defined hearing loss between atorvastatin and non-  
171 statin users was estimated by fitting the Poisson model using PROC NLMIXEDA for the  
172 total population as well as for subgroups (sex, cumulative cisplatin dose, individual  
173 cisplatin dose, baseline hearing status and radiation). A logistic regression analysis  
174 (SAS PROC LOGISTIC procedure) with calculation of odds ratios and 95% confidence

175 intervals was performed to identify associations between TUNE-defined changes in  
176 hearing and statin use after adjustment for significant covariates.

177  
178 Among subjects not taking any statin, the incidence of a hearing loss per TUNE criteria  
179 was 53.4% (Fig. S1A). The incidence of Grade 1 or higher cisplatin-induced hearing  
180 loss was significantly reduced relative to the non-statin user group from 53.4% to 39.9%  
181 ( $\chi^2= 9.6$ ,  $p<0.01$ ) in the any-statin user group and 34.0% in the atorvastatin user group,  
182 ( $\chi^2= 11.2$ ,  $p<0.001$ ) (Supplementary Fig. S1A). 36.5% of subjects in the no statin group  
183 had a grade 2 or higher change in hearing compared to 14.4% of those in the  
184 atorvastatin group ( $\chi^2=21.2$ ,  $p<0.001$ ) (Fig. S1B)

185  
186 The logistic regression allowed us to calculate adjusted odds ratios (OR) with 95%  
187 confidence intervals for the three variables identified in our mixed effects analysis  
188 (MEM) analysis (Table S2) that were significantly associated with cisplatin-induced  
189 hearing loss: statin use, cumulative cisplatin dose and baseline hearing status. Using  
190 TUNE-defined hearing loss criteria, results indicate that for every 100 mg/m<sup>2</sup> increase in  
191 cisplatin dose, a person is 1.8 times more likely to develop hearing loss (OR=1.80, 95%  
192 CI:1.36-2.43) (Table S5). Additionally, with every 20 dB increase in PTA threshold at  
193 baseline, a person is 44% (OR=0.56, 95% CI: 0.41-0.76) less likely to acquire a  
194 cisplatin-induced hearing loss. Finally, an individual on atorvastatin is 56% less likely  
195 (OR= 0.44, 95% CI: 0.27-0.72) to acquire a cisplatin-induced hearing loss compared to  
196 a non-statin user after controlling for cumulative cisplatin dose and baseline hearing.



197 **Figure S1: Incidence and severity of a TUNE-defined hearing loss in cisplatin-**  
 198 **treated patients with head and neck cancer**

199

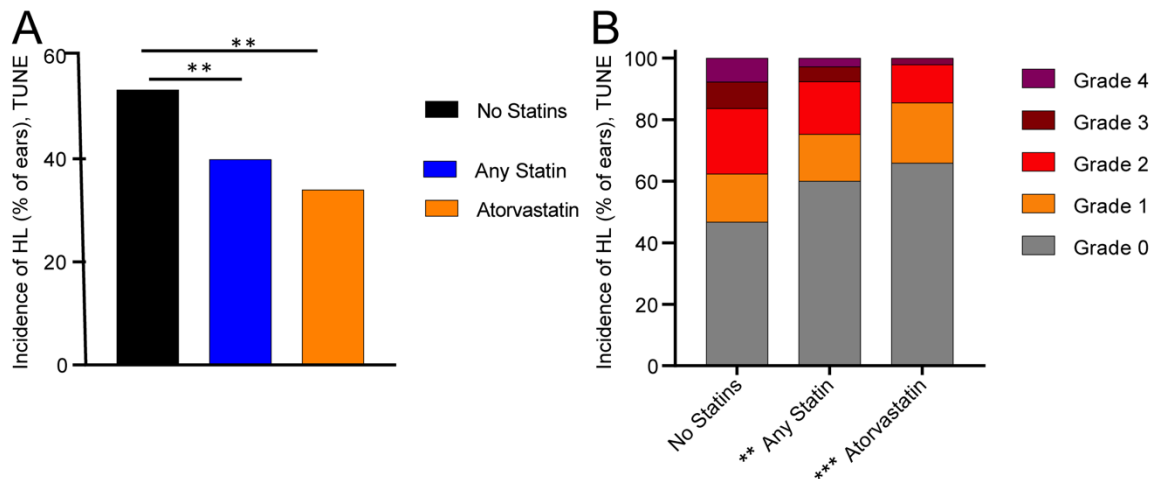

200 **Figure S1: The incidence and severity of cisplatin-induced hearing loss (as**  
 201 **defined by TUNE criteria) is reduced among atorvastatin users relative to non-**  
 202 **statin users A:** The incidence of cisplatin-induced hearing loss is 52% per TUNE  
 203 criteria amongst non-statin users (black). Subjects taking any statin (blue bar) had  
 204 significantly lower incidence of cisplatin-induced hearing loss than non-statin users. The  
 205 incidence of hearing loss was further reduced among atorvastatin users to 34% (orange  
 206 bar). Data are percent of ears per group. Statistical analysis consisted of Chi-Square,  
 207 **\*\*p<0.01. B:** Statin use, atorvastatin in particular, is associated with reduced severity of  
 208 hearing loss. TUNE scale criteria were used to categorize the severity of cisplatin-  
 209 induced hearing loss. Subjects taking any statin had significantly reduced incidence of a  
 210 Grade 2 or higher hearing loss compared to non-statin users. This difference was even  
 211 greater for atorvastatin users. Data are percentage of ears per group. Statistical  
 212 analysis consisted of Chi-Square, \*p<0.05, \*\*\*p<0.001.

214

215 **Figure S2: Correlation of cochlear radiation dose and high frequency hearing**  
216 **sensitivity**

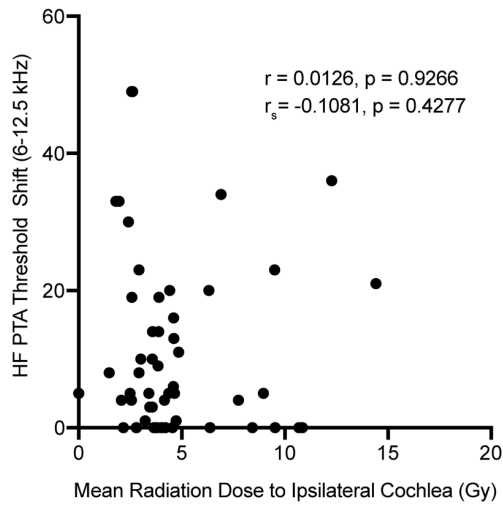

217  
218 **Figure S2: Cochlear radiation dose is not correlated with changes in high**  
219 **frequency hearing sensitivity.** Plotted are high frequency (6 to 12.5 kHz) threshold  
220 shifts and the mean cochlear radiation dose for each ear in the prospective cohort.  
221 Pearson r and Spearman correlation,  $p > 0.05$ . N=56 ears.

222  
223  
224  
225  
226  
227  
228  
229

230 **Table S1: Study participation criteria**

| Table S1. Study Participation Criteria  |                                                                      |
|-----------------------------------------|----------------------------------------------------------------------|
| Inclusion                               | Exclusion                                                            |
| Adult, 18 yr or older                   | Prior exposure to cisplatin, taxanes or cytotoxic chemotherapy drugs |
| Confirmed HNSCC Diagnosis               | Profound hearing loss at baseline <sup>A</sup>                       |
| Prescribed cisplatin-based chemotherapy | Indication of active middle ear disease <sup>B</sup>                 |

Head and neck squamous cell carcinoma (HNSCC)

<sup>A</sup>Pure tone average (PTA) at 1, 2, and 4 kHz >95 dB hearing level (HL)

<sup>B</sup>Active middle ear disease determined by tympanometry and/or bone conduction audiometry

231  
232

233

234

235

236

237

238

239

240

241

242

243

244

245

246

247

248

249

250

251 **Table S2: Site contributions**

| Table S2: Site Contributions          |                                                                 |                                                                        |                                                                                      |
|---------------------------------------|-----------------------------------------------------------------|------------------------------------------------------------------------|--------------------------------------------------------------------------------------|
|                                       | Retrospective Data                                              |                                                                        | Prospective Data                                                                     |
|                                       | University of Rochester<br>Medical Center (URMC)<br>N=215 (78%) | Walter Reed National Military<br>Medical Center (WRNMMC)<br>N=34 (12%) | National Institutes of Health (NIH)/<br>Johns Hopkins University (JHU)<br>N=28 (10%) |
| Subject Characteristics (Table 1)     | ✓                                                               | ✓                                                                      | ✓                                                                                    |
| Concomittent Statin Medications       | ✓                                                               | ✓                                                                      | ✓                                                                                    |
| Cancer Diagnosis/Treatment Parameters | ✓                                                               | ✓                                                                      | ✓                                                                                    |
| Assessments of Middle Ear Function    | Bone Conduction                                                 | Tympanometry                                                           | Tympanometry                                                                         |
| Auditory Assessments                  | Std. <sup>A</sup> + EHF <sup>B</sup>                            | SRO <sup>C</sup>                                                       | Std. <sup>A</sup> + EHF <sup>B</sup>                                                 |

<sup>A</sup>Standard audiometric frequencies include 1, 2, 3, 4, 6, and 8 kHz

<sup>B</sup>Extended high frequencies include 10 and 12 or 12.5 kHz

<sup>C</sup>Sensitive region for ototoxicity frequencies include 0.25, 1, 1.5, 2, 3, 4, 5.6, 6, 6.3, 7.1, 8, 9, 10, 11.2, 12.5 kHz

252  
253

254

255

256

257

258

259

260

261

262

263

264

265

266

267

268

269 **Table S3: Ototoxicity grading criteria**

| Table S3. Ototoxicity Grading Criteria <sup>A</sup> |                             |                      |                                                  |                                       |
|-----------------------------------------------------|-----------------------------|----------------------|--------------------------------------------------|---------------------------------------|
| Scale                                               | Frequency Range             | Grade                | Criteria                                         | Reference                             |
| CTCAE                                               | 1-8 kHz                     | Grade 1              | Average 15-25 dB TS at 2 consecutive frequencies | National Cancer Institute (NCI), 2017 |
|                                                     |                             | Grade 2              | Average >25 dB TS at 2 consecutive frequencies   |                                       |
|                                                     |                             | Grade 3              | Average >25 dB TS at 3 consecutive frequencies   |                                       |
|                                                     |                             | Grade 4              | Absolute threshold >80 dB at 2 kHz and above     |                                       |
| TUNE                                                | PTA 1-2-4<br>or 8-10-12 kHz | Grade 1              | ≥10 dB TS at 1-2-4 kHz or 6-8-12 kHz             | Theunissen et al., 2014               |
|                                                     |                             | Grade 2              | ≥20 dB TS at 1-2-4 kHz or 6-8-12 kHz             |                                       |
|                                                     |                             | Grade 3 <sup>B</sup> | ≥35 dB TS at 1-2-4 kHz or 6-8-12 kHz             |                                       |
|                                                     |                             | Grade 4 <sup>B</sup> | ≥50 dB TS at 1-2-4 kHz or 6-8-12 kHz             |                                       |

<sup>A</sup>Data based on shifts in dB hearing levels obtained using air conduction (AC) audiometry

<sup>B</sup>Scale criteria modified from original reference to accommodate threshold shift data

270  
271

272

273

274

275

276

277

278

279

280

281

282

283

284

285

286

287

288 **Table S4: Logistic regression with adjusted odds ratio (OR) on the incidence of a**  
 289 **CTCAE or TUNE grade hearing loss**

| Table S4. Logistic Regression with Adjusted Odds Ratios (OR) on the Incidence of a CTCAE or TUNE Hearing Loss <sup>A</sup> |          |    |         |                    |          |    |         |                    |
|----------------------------------------------------------------------------------------------------------------------------|----------|----|---------|--------------------|----------|----|---------|--------------------|
| Effect                                                                                                                     | CTCAE    |    |         |                    | TUNE     |    |         |                    |
|                                                                                                                            | $\chi^2$ | df | P value | OR (95% CI)        | $\chi^2$ | df | P value | OR (95% CI)        |
| Atorvastatin Use                                                                                                           | 7.46     | 1  | 0.006   | 0.48 (0.29 - 0.81) | 7.46     | 1  | 0.002   | 0.46 (0.28 - 0.76) |
| Cisplatin Dose <sup>B</sup>                                                                                                | 25.34    | 1  | <0.001  | 1.01 (1.01 - 1.01) | 25.34    | 1  | <0.001  | 1.01 (1.00 - 1.01) |
| Baseline Hearing <sup>C</sup>                                                                                              | 9.55     | 1  | 0.002   | 0.60 (0.44 - 0.83) | 9.55     | 1  | <0.001  | 0.56 (0.41 - 0.76) |

Confidence intervals (CI)

<sup>A</sup>Hearing loss defined as a change in hearing meeting CTCAE or TUNE Grade 1 minimum criteria

<sup>B</sup>Cisplatin dose is cumulative cisplatin dose over length of cisplatin therapy. OR data calculated based on units of 100 mg/m<sup>2</sup>

<sup>C</sup>Baseline hearing based on the pure tone average (PTA) of 1, 2, and 4 kHz

290  
 291  
 292  
 293  
 294  
 295  
 296  
 297  
 298  
 299  
 300

301 **Supplementary Appendix References**

302

- 303 1. American National Standards Institute/Acoustical Society of America (ANSI/ASA)  
304 S3.6. *Specifications for Audiometers*. American National Standards Institute; 2018.
- 305 2. Brungart D, Schurman J, Konrad-Martin D, et al. Using tablet-based technology to  
306 deliver time-efficient ototoxicity monitoring. *Int J Audiol*. 2018;57(sup4):S78-S86.  
307 doi:10.1080/14992027.2017.1370138
- 308 3. Thompson GP, Sladen DP, Borst BJH, Still OL. Accuracy of a Tablet Audiometer for  
309 Measuring Behavioral Hearing Thresholds in a Clinical Population. *Otolaryngol Neck*  
310 *Surg*. 2015;153(5):838-842. doi:10.1177/0194599815593737
- 311 4. National Cancer Institute (NCI). Common Terminology Criteria for Adverse Events  
312 (CTCAE) | Protocol Development | CTEP. Published 2017. Accessed December 29,  
313 2019.  
314 [https://ctep.cancer.gov/protocolDevelopment/electronic\\_applications/ctc.htm#ctc\\_50](https://ctep.cancer.gov/protocolDevelopment/electronic_applications/ctc.htm#ctc_50)
- 315 5. Brock P, Bellman S, Yeomans E, Pinkerton C, Pritchard J. Cisplatin ototoxicity in  
316 children: a practical grading system. - PubMed - NCBI. *Med Pediatr Oncol*.  
317 1991;19(4):295-300. doi:10.1002/mpo.2950190415
- 318 6. Theunissen EAR, Dreschler WA, Latenstein MN, et al. A New Grading System for  
319 Ototoxicity in Adults. *Ann Otol Rhinol Laryngol*. 2014;123(10):711-718.  
320 doi:10.1177/0003489414534010

321
